# Supplementary material for: Melatonin in Apples and Juice: Inhibition of Browning and Microorganism Growth in Apple Juice
Source: PubMed Central journal article supplement (PMC6017754; doi:10.3390/molecules23030521), 2018-02-27
Supplement: molecules-23-00521-s001.pdf [file molecules-23-00521-s001.pdf]

Table 1. Melatonin levels in the peel of different cultivars

| Melatonin levels              | Cultivars                                                                                  |
|-------------------------------|--------------------------------------------------------------------------------------------|
| Super-high level (70-110ng/g) | 'Shinsekai 1', 'Jinhong', 'Jincui'                                                         |
| High level (45-70ng/g)        | 'Jonagold', 'Stark Jumbo', 'Tompkin's King', 'Fuji'                                        |
| Medium level (20-45ng/g)      | 'Jiguan', 'Shanfu 2', '4-23', 'Xiaoshuai'                                                  |
| Low level (0-20ng/g)          | 'Baishaguo', 'Orin', 'Ralls', 'Granny Smith', 'Changfu 2', 'Ben Davis', 'Golden Delicious' |

Table 2. Melatonin levels in the flesh of different cultivars

| Melatonin levels               | Cultivars                                                                                                    |
|--------------------------------|--------------------------------------------------------------------------------------------------------------|
| Super-high level (110-150ng/g) | 'Shinsekai 1'                                                                                                |
| High level (45-110ng/g)        | 'Jinhong'                                                                                                    |
| Medium level (20-45ng/g)       | 'Jonagold', 'Stark Jumbo', 'Jincui', 'Xiaoshuai', '4-23', 'Tompkin's King', 'Shanfu 2'                       |
| Low level (0-20ng/g)           | 'Fuji', 'Ralls', 'Granny Smith', 'Orin', 'Jiguan', 'Baishaguo', 'Ben Davis', 'Golden Delicious', 'Changfu 2' |
